# Supplementary material for: Technical Note: Multiple wavelet coherence for untangling scale-specific and localized multivariate relationships in geosciences
Source: Copernicus journal article supplement (doi:10.5194/hess-2016-154), 2016-04-27
Supplement: Supplementary file [file hess-2016-154-AC1-supplement.pdf]

Technical Note: Multiple wavelet coherence for untangling scale-specific and localized multivariate relationships in geosciences

Wei Hu<sup>2,3</sup> and Bing Cheng Si<sup>1,3</sup>

<sup>1</sup>*College of Hydraulic and Architectural Engineering, Northwest A&F University, Yangling 712100, China*

<sup>2</sup>*New Zealand Institute for Plant & Food Research Limited, Private Bag 4704, ~~8140~~ Christchurch 8140, New Zealand*

<sup>3</sup>*University of Saskatchewan, Department of Soil Science, Saskatoon, SK S7N 5A8, Canada*

Correspondence to: Wei Hu (wei.hu@plantandfood.co.nz) and Bing Cheng Si (bing.si@usask.ca)

**Abstract**

The scale-specific and localized bivariate relationships in geosciences can be revealed using ~~bivariatesimple~~ wavelet coherence. The objective of this study ~~is~~ was to develop a multiple wavelet coherence method for examining scale-specific and localized multivariate relationships. Stationary and non-stationary artificial datasets, generated with the response variable as the summation of five predictor variables (cosine waves) with different scales, were used to test the new method. Comparisons were also conducted using existing multivariate methods including multiple spectral coherence and multivariate empirical mode decomposition (MEMD). Results show that multiple spectral coherence is unable to identify localized multivariate relationships and underestimates the scale-specific multivariate relationships for non-stationary processes. The MEMD method was able to separate all variables into

components at the same set of scales, revealing scale-specific relationships when combined with multiple correlation coefficients, but has the same weakness as multiple spectral coherence. However, multiple wavelet coherences are able to identify scale-specific and localized multivariate relationships, as they are close to 1 at multiple scales and locations corresponding to those of predictor variables. Therefore, multiple wavelet coherence outperforms other common multivariate methods. Multiple wavelet coherence was applied to a real dataset and revealed the optimal combination of factors for explaining temporal variation of free water evaporation at Changwu site in China at multiple scale-location domains. Matlab codes for multiple wavelet coherence are developed and provided in the supplement.

## 1. Introduction

Geoscience data such as topography, climate, and ocean waves usually present cyclic patterns, with high-frequency (small-scale) processes being superimposed on low-frequency (large-scale) processes (Si, 2008). More often than not, geoscience data ~~is~~are non-stationary~~transient~~, consisting of a variety of frequency regimes that may be localized in space or time (Torrence and Compo, 1998; Si and Zeleke, 2005; Graf et al., 2014). The transient characteristics exists widely in non-stationary but also sometimes in stationary processes (Feldstein, 2000). The wavelet method is a common tool for detecting multi-scale and localized features of ~~non-stationary~~transient processes in geosciences. ~~Simple-Bivariate~~ wavelet coherency has been widely used for untangling scale-specific and localized relationships for

~~non-stationary~~transient processes in areas including geophysics (Lakshmi et al., 2004; Müller et al., 2008), hydrology (Labat et al., 2005; Das and Mohanty, 2008; Tang and Piechota, 2009; Carey et al., 2013; Graf et al., 2014), soil science (Si and Zeleke, 2005; Biswas and Si, 2011), meteorology (Torrence and Compo, 1998), and ecology (Polansky et al., 2010). This method, however, is limited to two variables. Processes in geosciences are usually complex and may be affected by more than two environmental factors. A method is needed for analyzing multivariate (>2 variables) and localized relationships at multiple scales.

Several methods have been used for characterizing multivariate relationships. For example, multiple spectral coherence (MSC) has been used to explore the scale-specific relationships between soil saturated hydraulic conductivity ( $K_s$ ) and multiple soil physical properties (Koopmans, 1974; Si, 2008), but requires a stationary data series which is rare in geosciences. Multivariate empirical mode decomposition (MEMD), a data-driven method, decomposes each variable into different components (intrinsic mode functions (IMFs)) with each IMF corresponding to a “common scale” inherent in multiple variables (Rehman and Mandic, 2010). The MEMD method is meritorious due to its ability to deal with both ~~non-stationary~~transient and nonlinear systems. The combination of squared multiple correlation coefficient and MEMD ( $MCC_{memd}$ ) has been used to explore the multivariate control of soil water content or saturated hydraulic conductivity at multiple scales (Hu and Si, 2013; She et al., 2013, 2015; Hu et al., 2014). However, the sum of variances from different components typically ~~does~~did not equal the total variance of the original series, which may ~~result~~

65 | ~~in~~produce misleading  $MCC_{memd}$  results. In addition, in geosciences, multivariate  
66 relationships are most likely to change with time or space due to  
67 | ~~non-stationarity~~transient of the processes involved. However, localized multivariate  
68 relationships are not available using any of the existing multivariate methods.  
69 Therefore, it is required to extend the wavelet coherence from two variables to  
70 multiple variables.

71 An attempt to extend wavelet coherence from two to three variables has been made  
72 by Mihanović et al. (2009). Their method was also applied later in the marine sciences  
73 | (Ng and Chan, 2012a, b). Limitations arise when using ~~the trivariate~~three-variable  
74 wavelet coherence: first, only two predictor variables are considered; second, the two  
75 predictor variables must be orthogonal. Otherwise, extremely high or low (spurious)  
76 coherence ( $>1$  or  $<0$ ) may be produced. This spuriousness is inconsistent with the  
77 definition of coherence and may limit the application of this method in geosciences,  
78 where environmental variables are usually cross-correlated. Therefore, a robust  
79 method for calculating MWC, which produces coherence in the closed interval of  $[0,$   
80  $1]$ , is needed.

81 The objective of this paper is to develop an MWC that applies to cases where there  
82 are multiple environmental variables of which may be cross-correlated. This method  
83 is first tested with artificial datasets to demonstrate its advantages over existing  
84 multivariate methods. The superiority of the new method over others can be assessed  
85 by whether the known major features of the artificial data are demonstrated by these  
86 methods. It is then applied to a temporal series of evaporation ( $E$ ) from free water

Formatted: Font: (Default) Times New Roman, 12 pt, Not Bold, Font color: Auto

Formatted: Font: (Default) Times New Roman, 12 pt, Not Bold, Font color: Auto

Formatted: Font: (Default) Times New Roman, 12 pt, Not Bold, Font color: Auto

Formatted: Font: (Default) Times New Roman, 12 pt, Not Bold, Font color: Auto

87 surface and meteorological factors at Changwu site in Shaanxi, China.

## 88 2. Theory

89 BivariateSimple wavelet coherence can be understood as the traditional correlation  
90 coefficient localized in the scale-location domain (Grinsted et al., 2004). Just as  
91 correlation coefficients can be extensions-extended from two variables to multiple (>2)  
92 variables, wavelet coherence between two variables may also be extended to multiple  
93 variables. Similar to bivariatesimple wavelet coherence, MWC is based on a series of  
94 auto- and cross-wavelet power spectra at different scales and spatial (or temporal)  
95 locations for the response variable and all predictor variables.

96 Following Koopman (1974), a matrix representation of the smoothed auto- and  
97 cross-wavelet power spectra for multiple predictor variables  $X$  ( $X = \{X_1, X_2, \dots, X_q\}$ )  
98 can be written as

$$99 \quad \vec{W}^{X,X}(s, \tau) = \begin{bmatrix} \vec{W}^{X_1, X_1}(s, \tau) & \vec{W}^{X_1, X_2}(s, \tau) & \cdots & \vec{W}^{X_1, X_q}(s, \tau) \\ \vec{W}^{X_2, X_1}(s, \tau) & \vec{W}^{X_2, X_2}(s, \tau) & \cdots & \vec{W}^{X_2, X_q}(s, \tau) \\ \vdots & \vdots & \ddots & \vdots \\ \vec{W}^{X_q, X_1}(s, \tau) & \vec{W}^{X_q, X_2}(s, \tau) & \cdots & \vec{W}^{X_q, X_q}(s, \tau) \end{bmatrix}, \quad (1)$$

100 where  $\vec{W}^{X_i, X_j}(s, \tau)$  is the smoothed auto-wavelet power spectra (when  $i=j$ ) or  
101 cross-wavelet power spectra (when  $i \neq j$ ) at scale  $s$  and spatial (or temporal) location  
102  $\tau$ , respectively. For the detailed calculation of smoothed auto- and cross-wavelet  
103 power spectra, see Supplement, Sect. S1.

104 The matrix of smoothed cross wavelet power spectra between response variable  $Y$   
105 and predictor variables  $X_i$  can be defined as

Field Code Changed

$$\vec{W}^{Y,X}(s,\tau) = \left[ \vec{W}^{Y,X1}(s,\tau) \quad \vec{W}^{Y,X2}(s,\tau) \quad \cdots \quad \vec{W}^{Y,Xq}(s,\tau) \right], \quad (2)$$

where  $\vec{W}^{Y,Xi}(s,\tau)$  is the smoothed cross-wavelet power spectra between  $Y$  and  $Xi$  at scale  $s$  and spatial (or temporal) location  $\tau$ .

The smoothed wavelet power spectrum of response variable  $Y$  is  $\vec{W}^{Y,Y}(s,\tau)$ .

Following Koopmans (1974), the MWC at scale  $s$  and location  $\tau$ ,  $\rho_m^2(s,\tau)$ , can be written as

$$\rho_m^2(s,\tau) = \frac{\vec{W}^{Y,X}(s,\tau) \vec{W}^{X,X}(s,\tau)^{-1} \overline{\vec{W}^{Y,X}(s,\tau)}}{\vec{W}^{Y,Y}(s,\tau)}. \quad (3)$$

When only one predictor variable (e.g.,  $X1$ ) is included in  $X$ , Eq. (3) is the equation for ~~bivariatesimple~~ wavelet coherence,  $\rho_b^2(s,\tau)$   ~~$\rho_s^2(s,\tau)$~~ , ~~between two~~ ~~variables which can be expressed as~~ (Torrence and Webster, 1999; Grinsted et al., 2004):

Field Code Changed

$$\rho_b^2(s,\tau) = \frac{\vec{W}^{Y,X1}(s,\tau) \overline{\vec{W}^{Y,X1}(s,\tau)}}{\vec{W}^{X1,X1}(s,\tau) \vec{W}^{Y,Y}(s,\tau)}. \quad (4)$$

Field Code Changed

Therefore, ~~bivariatesimple~~ wavelet coherence is consistent with multiple wavelet coherence if only one predictor variable is included. In addition, the wavelet phase between a response variable ( $Y$ ) and a predictor variable ( $X1$ ) is

$$\phi(s,\tau) = \tan^{-1} \left( \text{Im} \left( W^{Y,X1}(s,\tau) \right) / \text{Re} \left( W^{Y,X1}(s,\tau) \right) \right), \quad (5)$$

where Im and Re denote the imaginary and real part of  $W^{Y,X1}(s,\tau)$ , respectively.

Note that the phase information between a response variable  $Y$  and multiple predictor variables  $X$  cannot be obtained.

Multiple wavelet coherence at the 95% confidence level is calculated using the

Monte Carlo method (Grinsted et al., 2004). Surrogate spatial series (i.e., red noise) of all variables are generated with a Monte Carlo simulation based on their first-order autocorrelation coefficient (AR1). The MWC at each scale and location is calculated using the simulated spatial series. This is repeated an adequate number of times (e.g., 1000) (Grinsted et al., 2004). At each scale, MWCs at all locations outside the cones of influence from all simulations are ranked in ascending order. The value at the 95th percentile represents the 95% confidence level for the MWC at that scale. The Matlab codes and user manual document for calculating MWC and significance level are provided in the Supplement (Sect. S2–S4).

### 3. Data and analysis

#### 3.1 Artificial data for method test

The method is tested using a stationary and non-stationary artificial dataset generated following Yan and Gao (2007). The response variable ( $y$  for the stationary case and  $z$  for the non-stationary case) encompasses five cosine waves ( $y_1$  to  $y_5$  for the stationary case and  $z_1$  to  $z_5$  for the non-stationary case) with different dimensionless scales (Fig. 1). For the stationary case,  $y_1 = \cos(2\pi x/4)$ ,  $y_2 = \cos(2\pi x/8)$ ,  $y_3 = \cos(2\pi x/16)$ ,  $y_4 = \cos(2\pi x/32)$ , and  $y_5 = \cos(2\pi x/64)$ , where  $x = 0, 1, 2, \dots, 255$ . There is one regular cycle every 4, 8, 16, 32, and 64 locations, representing dimensionless scales of 4, 8, 16, 32, and 64 for  $y_1$ ,  $y_2$ ,  $y_3$ ,  $y_4$ , and  $y_5$ , respectively (Fig. 1a). The regular cycles make each predictor and response series stationary. For the non-stationary case,  $z_1 = \cos(500\pi(x/1000)^{0.5})$ ,  $z_2 = \cos(250\pi(x/1000)^{0.5})$ ,

147  $z_3 = \cos(125\pi(x/1000)^{0.5})$ ,  $z_4 = \cos(62.5\pi(x/1000)^{0.5})$ , and  $z_5 = \cos(31.25\pi(x/1000)^{0.5})$ ,  
148 where  $x=0, 1, 2, \dots, 255$ . The equation with the square root of the location term  
149 results in the gradual change in frequency (scale), with the greatest dimensionless  
150 scales of 4, 8, 16, 32, and 64 at the right hand side for  $z_1$ ,  $z_2$ ,  $z_3$ ,  $z_4$ , and  $z_5$ ,  
151 respectively (Fig. 1b). The average scales for these predictor variables are 3, 5, 9, 17,  
152 and 32, respectively. The location-varying scales make each predictor and response  
153 variable non-stationary.

154 For both the stationary and non-stationary series, the variance of the response  
155 variable is 2.5. The predictor variables, each with a variance of 0.5, are orthogonal to  
156 each other, and contribute equally to the total variance of the response variable. The  
157 cosine-like artificial datasets mimic many time series such as seismic signals,  
158 turbulence, air temperature, precipitation, hydrologic fluxes, and the El  
159 Niño-Southern Oscillation. They also mimic spatial series such as ocean waves,  
160 seafloor bathymetry, land surface topography, and soil water content along a  
161 hummocky landscape in geosciences. Therefore, they are representative of a  
162 geoscience data series and are suitable for testing the new method.

163 Multiple wavelet coherence between the response variable  $y$  (or  $z$ ) and two ( $y_2$  and  
164  $y_4$ , or  $z_2$  and  $z_4$ ) or three ( $y_2$ ,  $y_3$ , and  $y_4$ , or  $z_2$ ,  $z_3$ , and  $z_4$ ) predictor variables were  
165 calculated. The advantage of the artificial data is that the known scale- and localized  
166 features for all variables, and the known relationships between the response and each  
167 predictor variable are exact. By definition, the coherence is 1 at scales corresponding  
168 to that of included predictor variables and 0 at other scales.



To demonstrate the advantages of MWC in dealing with abrupt changes (a type of transient and localized feature), the second half of the original series of  $y_2$  (or  $z_2$ ) or  $y_4$  (or  $z_4$ ) is replaced by 0, and MWC between the response variable and new set of predictor variables is calculated. We anticipate that the coherence changes from 1 to 0 at the location where the new predictor variable becomes 0.

Predictor variables may not be as regular as that shown in Fig. 1 and may also be cross-correlated to one another. For these reasons, zero-mean white noises with ~~a~~ mean of 0 and a standard deviations of 0.3, 1, and 4 are ~~generated and~~ added to the predictor variables of  $y_2$  (or  $z_2$ ) and  $y_4$  (or  $z_4$ ). The resulting noised series have correlation coefficients of 0.9, 0.5, and 0.1, respectively, with their original predictor variable. Therefore, we will refer them to ~~are termed~~ weakly, moderately, and highly noised series, respectively, ~~and have a correlation coefficient of 0.9, 0.5, and 0.1 respectively, with their original predictor variable.~~ Multiple wavelet coherences between the response variable and different predictor variables (original and noised series) are calculated to demonstrate the performance of MWC when noised or correlated predictor variables are involved. Only the non-stationary case will be demonstrated because the performances of MWC for stationary and non-stationary cases are similar.

The MWC is compared to the MSC (Koopmans, 1974; Si, 2008) and  $MCC_{memd}$  (Hu and Si, 2013), which are widely used for spatial or temporal series analysis in different disciplines. The advantages of the new method over these two methods will be demonstrated mainly in terms of relationships between response and predictor

variables at various scales of the response variable. The MSC is calculated based on the calculated auto- and cross- power spectra using an equation similar to Eq. (3). The detailed introduction of this method can be found in Si (2008). For the calculation of  $MCC_{memd}$ , a set of response and predictor variables form a multivariate data series for MEMD. The MEMD is a data driven method and has the ability to align “common scales” present within multivariate data. Please refer to Rehman and Mandic (2010) and Hu and Si (2013) for the MEMD analysis and the website (<http://www.commsp.ee.ic.ac.uk/~mandic/research/emd.htm>) for the related Matlab codes. The original series of response and predictor variables can be decomposed into different components (IMFs) with different scales by the MEMD. For IMFs at the same scale, multiple stepwise regressions are conducted between response and predictor variables, and the multiple correlation coefficients for each scale-specific IMF are calculated.

### **3.2 Real data for application**

Daily evaporation ( $E$ ) from free water surfaces of E601 evaporation pan (pan diameter of 61.8 cm) and other meteorological factors (i.e., relative humidity, mean temperature, sun hours, and wind speed) were collected from January 1, 1979 to December 31, 2013 at Changwu site in Shaanxi, China. The Changwu site is a transition area between semi-arid and subhumid climate where water limits agricultural productivity. Monthly averages of all variables were used in this study because we are mainly interested in seasonal and inter-annual variability.

## 4. Results and discussion

### 4.1 MWC with orthogonally predictor variables

For the stationary data, there are two narrow horizontal bands (red color) representing an MWC value of around 1 at the respective scales of 8 and 32 for all locations (Fig. 2a). These two bands also correspond to the scales of 8 and 32, respectively, for the two predictor variables. When an additional predictor variable with the scale of 16 is introduced, a wide band from 6 to 40 appears, signifying that the MWC equals approximately 1 at all locations at the scales of 8, 16, and 32. As anticipated, when all five predictor variables with scales ranging from 4 to 64 are included, coherence values of close to 1 are found in the whole scale-location domain (data not shown).

The application of MWC to the non-stationary datasets shows that the scales with significant MWC values gradually increase with the increase in distance. This increase in the scales is due to the non-stationarity of the variables (Fig. 2b). For example, when predictor variables of z2 and z4 are included, scales of the two bands corresponding to MWC around 1 increase from 4 to 8 and from 8 to 32, respectively. Furthermore, as expected, for only one predictor variable (stationary and non-stationary), MWC reduces to ~~bivariate~~simple wavelet coherence; there is only one band of coherence around 1, which corresponds to the scale of that predictor variable (data not shown). Note that the significant MWC values for both stationary and non-stationary cases are not exactly 1 at all scales or locations due to the

smoothing effect along both scales and locations. However, the mean MWC values of the significant bands are very high (i.e., 0.94–1.00) and the MWC values at the centre of the significant band are 1, which corresponds to the exact scale of a predictor variable.

When the point values in the second half of the data series of a predictor variable is replaced by 0, the MWC in that half is almost 0 at scales corresponding to that predictor variable (Fig. 3). For the stationary case, when the point values in the second half of the data series of predictor variable y2 (or y4) is replaced by 0, the MWC is around 1 at the scale of 8 (or 32) in the first half of the transect and 0 in the second half (Fig. 3a). Similar results ~~were~~are also found for the non-stationary case (Fig. 3b). This is expected because the constant series of 0 is not correlated to the response variables at any scale. Much like ~~bivariate~~simple wavelet coherence, the MWC method is able to detect abrupt changes in the data series and has the advantages of dealing with localized multivariate relationships.

#### **4.2 MWC with noised and correlated predictor variables**

When z2 and a noised series derived from z2 are included as predictor variables, there is only one band of coherence close to 1 at scales corresponding to z2, irrespective of the correlation between z2 and a noised series of z2 (Fig. 4a). When z2 and a noised series of z4 are included as predictor variables, the coherence depends on the degree of the noise (Fig. 4b). For weakly noised series, there are two bands of coherence of around 1 corresponding to the scales of z2 and z4, respectively. The

percentage area of significant coherence (PASC) is 23%, which equals that of when z2 and z4 are included. With the increasing magnitude of noise, the coherence and corresponding PASC at the scales corresponding to z4 decrease. When z2 and a strongly noised series of z4 are considered, the band of coherence around 1 at scales corresponding to z4 disappears.

The inclusion of a third noised z4 variable substantially increases the area with high coherence (in red) as compared to the case when only z2 and z4 are included (Fig. 4c). This indicates that MWC will increase with the increase in the number of predictor variables, with the highest coherence less or equal to 1, irrespective of the number of predictor variables. However, the area of significant coherence may not necessarily increase because of the simultaneously increased statistical significance threshold (Ng and Chan, 2012a). In fact, the PASC values for three predictor variables (19–20%) are lower than for only two predictor variables (23%). This indicates that, in this case, two predictor variables are better than three in terms of explaining the variations of the response variable. This is because the variance of the response variable explained by the noised variable is already accounted for by other variables. Therefore, only an additional variable that can independently explain a fair amount of variance could contribute significantly to explaining variations of a response variable (Fig. 4b). This can also explain why there is only one band of coherence around 1 at scales corresponding to z2, when z2 and a noised series of z2 are included (Fig. 4a). This information is helpful in choosing predictor variables for developing scale-specific predictions, especially when predictor variables are correlated.

## 4.3 Comparison with other multivariate methods

### 4.3.1 MSC

The MSC as a function of scale is shown in Fig. 5a. For the stationary case, when  $y_2$  and  $y_4$  are included as predictor variables, there are two plateaus centered at the scales of 8 and 28 representing a coherence of 1. As expected, when an additional predictor variable  $y_3$  is added, the corresponding scale of 16 also shows coherence of 1. The MSC produces similar scale-specific relationships as MWC does for a stationary dataset except that the centered scale (i.e., 28) with coherence of 1 deviates from the expected value (i.e., 32) for predictor variable  $y_4$ . For the non-stationary case, however, the MSC is much lower than 1 for the predictor variables of  $z_2$  and  $z_4$ ; MSC of 1 is present only at the scale of 8 when an additional predictor variable  $z_3$  is added. Obviously, the MSC underestimates the multivariate relationships and is not suitable to non-stationary processes (Si, 2008) due to its inability to deal with localized features. The MSC at a specific scale provides the average of multivariate relationships across all locations. Because the scale of a predictor variable changes with location for the non-stationary case, the MSC deviates greatly from 1.

The inability of the MSC to deal with localized features is demonstrated further by the decrease of MSC at scales when the second half of the included predictor variable series are replaced by 0 for both the stationary and non-stationary series (Fig. 5b). For example, when the second half of the  $y_4$  series is replaced by 0 for the stationary case, the MSC at scales around 32 decreases from 1 to 0.52. Although the MSC can detect the decrease of coherence at the scales corresponding to the 0 values throughout the

second half of the series, the exact locations for the decrease cannot be identified. In fact, the coherence decreases only in the second half of the series, and does not change in the first half of the series. The location for the decrease can be easily identified by the MWC, but not by MSC.

#### 4.3.2 $MCC_{memd}$

Five intrinsic mode functions (IMFs) with non-negligible variance are obtained for multivariate data series. While the obtained scales for the response variable  $y$  are in agreement with the true scales for the stationary case, the obtained scales (i.e., 3, 6, 11, 21, and 43) for the response variable  $z$  deviate slightly from the average scales for the non-stationary case. For the response variable, the contribution of IMFs to the total variance generally decreases (20% to 13% for stationary and 27% to 11% for non-stationary) from IMF1 to IMF5, which disagrees with the fact that each scale contributes equally (i.e., 20%) to the total variance. In addition, the sum of variances over all IMFs for each variable is less than 100% (ranging from 84% to 93%), indicating that MEMD cannot capture all the variances. For the detailed results of MEMD, see Supplement, Sect. S5.

The  $MCC_{memd}$  as a function of scale is shown in Fig. 6a. For the stationary case, when predictor variables of  $y_2$  and  $y_4$  are included, the  $MCC_{memd}$  values are 0.98 and 0.93, respectively, at scales corresponding to that of  $y_2$  and  $y_4$ . When a predictor variable of  $y_3$  is included, the  $MCC_{memd}$  values are 1.00, 1.00, and 0.96, respectively, at scales corresponding to that of  $y_2$ ,  $y_3$ , and  $y_4$ . For the non-stationary case, the

corresponding  $MCC_{memd}$  values are 0.80 and 0.85 for the two predictor variable case, and 0.95, 0.99, and 0.91, respectively, for the case of three predictor variables. Therefore, the  $MCC_{memd}$  can be used to determine the scale-specific multivariate relationships. Similar to MSC, however, the  $MCC_{memd}$  underestimates the multivariate relationships, especially for the non-stationary case with less predictor variables. On the contrary, the  $MCC_{memd}$  ~~can~~ also overestimates the multivariate relationships. For example, when only predictor variables corresponding to scales of 8, 16, and 32 are considered, the  $MCC_{memd}$  value for the stationary case is 0.47 at the scale of 64, which deviates much from the expected  $MCC_{memd}$  value of 0 (Fig. 6a). The possible underestimation and overestimation by the  $MCC_{memd}$  may come from the decomposition errors inherent in the MEMD algorithm (Rehman and Mandic, 2010).

Similar to MSC, the localized multivariate relationships cannot be obtained from  $MCC_{memd}$ . This can be better explained by the decrease of  $MCC_{memd}$  when half of the series of the predictor variables are replaced by 0 (Fig. 6b). For the stationary case, the  $MCC_{memd}$  values at the scales corresponding to y2 (or y4) decrease from 0.98 to 0.49 and from 0.93 to 0.62 when the second half of the y2 (or y4) series are replaced by 0.

As explained above, the MWC has advantages in untangling localized multivariate relationships as compared to the common multivariate methods. It is important to reveal the multivariate relationships, which vary with time or space that are associated with different processes. For example, discharge usually happens on knolls, while recharge usually happens in neighboring depressions (Gates et al., 2011). Therefore,



the controlling factors of soil water storage may vary with the land element characteristics of a location. ~~For example, l~~ocal controls may be more important on knolls, while non-local controls may be more important in depressions (Grayson et al., 1997). In a temporal domain, vegetation transpiration contributes more to the evapotranspiration in the growing seasons, which may result in the changes of environmental factors explaining temporal variations of evapotranspiration in different seasons.

#### 4.4 Application of the MWC

Each meteorological factor was significantly correlated to the  $E$ , but the dominant factors explaining variation in  $E$  differed with scale. For example, the relative humidity was the dominating factor at small (2–8 months) and large (>32 months) scales, while temperature was the dominating factor at the medium (8–32 months) scales. Overall, the relative humidity corresponded to the greatest mean MWC (0.62) and PASC value (40%) at multiple scale-location domains. For the detailed relationships between  $E$  and each factor, see Supplement, Sect. S6.

The MWC analysis shows that the combination of relative humidity and mean temperature produced the greatest mean MWC (0.82) and PASC (49%) among all two-factor cases, indicating that they ~~are~~were the best to explain variations in  $E$  at multiple scale-location domains (Fig. 7a). However, adding an additional factor such as sun hours, which was the best among all three-factor cases, increased the average coherence (0.91), but slightly decreased the PASC to 48% (Fig. 7b). This indicated

that sun hours was not significantly different from red noise in explaining additional variation in  $E$ . Similar results were found when the wind speed was added. The reason for this was that most areas with significant coherence between  $E$  and sun hours or wind speed, were a subset of areas with significant coherence between  $E$  and relative humidity or mean temperature (see Supplement, Sect. S3). Therefore, relative humidity and mean temperature were adequate to explain the temporal variation of  $E$  at various scales at this site. This ~~is-was~~ consistent with Li et al. (2012), who indicated that relative humidity and mean temperature ~~are-were~~ the two main contributors to the temporal change of potential evapotranspiration on the Chinese Loess Plateau.

## 5. Conclusions

Multiple wavelet coherence is developed to determine scale-specific and localized multivariate relationships in geosciences. The new method is tested and compared with exiting multivariate methods using an artificial dataset. The new method can be used to determine the proportion of the variance of a response variable that is explained by predictor variables at a specific scale and location (spatially or temporally). As compared with ~~bivariatesimple~~ wavelet coherence, more variation may be explained at multiple scale-location domains by the MWC. Including more variables is only beneficial if the variables are not strongly cross-correlated and can independently explain a fair amount of variability in a response variable. Therefore, the best combinations of variables that explain multivariate spatial or temporal variability at multiple scales can be determined. This is important for optimizing

variables for developing scale-specific prediction.

The MSC and  $MCC_{memd}$  can determine multivariate relationships at multiple scales, but localized multivariate relationships are not available and both MSC and  $MCC_{memd}$  are likely to underestimate the degree of multivariate relationships for non-stationary processes. In addition, the performance of  $MCC_{memd}$  relies on the performance of MEMD, which needs further development. Application of the MWC into the real dataset indicates that the combination of relative humidity and mean temperature are the optimal factors to explain temporal variation of  $E$  at the Changwu site in China.

Limitations of the new method also exist. Theoretically, any number of predictor variables can be included in the multiple wavelet analysis. However, the statistical significance threshold usually increases with the number of the predictor variables (Grinsted et al., 2004; Ng and Chan, 2012a), and inclusion of too many predictor variables may result in the statistical significance threshold at particular wavelet scales (e.g., the lowest and largest scales) to approach unity. This would restrict the availability of statistical information. In addition, similar to bivariate wavelet analysis, the new method also suffers from the multiple-testing problem (Maraun and Kurths, 2004; Maraun et al., 2007; Schulte et al., 2015; Schulte, 2016). Therefore, a more robust statistical significance testing method may be beneficial to the new method.

In summary, multiple wavelet coherence has advantages over existing multivariate methods, and provides an effective vehicle for untangling complex spatial or temporal variability for multiple controlling factors at multiple scales and locations. It may also be used as a data-driven tool for modeling and predicting various processes in the area

405 of geosciences such as precipitation, drought, soil water dynamics, stream flow, and  
406 atmospheric circulation.

## 407 **Acknowledgements**

408 The Matlab codes for calculating multiple wavelet coherence are developed based on  
409 the codes provided by A. Grinsted  
410 (<http://noc.ac.uk/using-science/crosswavelet-wavelet-coherence>) and, together with  
411 user manual, are available in the Supplement (Sect. S2-S4). The project was partially  
412 funded by the Natural Sciences and Engineering Research Council of Canada  
413 (NSERC) and Agriculture Development Fund of Saskatchewan. We thank the two  
414 anonymous reviewers for their constructive comments.

## 415 **References**

416 Biswas, A. and Si, B. C.: Identifying scale specific controls of soil water storage in a  
417 hummocky landscape using wavelet coherency, *Geoderma*, 165, 50–59, doi:  
418 10.1016/j.geoderma.2011.07.002, 2011.

419 Carey, S. K., Tetzlaff, D., Buttle, J., Laudon, H., McDonnell, J., McGuire, K., Seibert,  
420 J., Soulsby, C., and Shanley, J.: Use of color maps and wavelet coherence to discern  
421 seasonal and interannual climate influences on streamflow variability in northern  
422 catchments, *Water Resour. Res.*, 49, 6194–6207, doi: 10.1002/wrcr.20469, 2013.

423 Das, N.N. and Mohanty, B. P.: Temporal dynamics of PSR-based soil moisture across  
424 spatial scales in an agricultural landscape during SMEX02: A wavelet approach,

425 Remote Sens. Environ., 112, 522–534, doi:10.1016/j.rse.2007.05.007, 2008.

426 [Feldstein, S. B.: The timescale, power spectra, and climate noise properties of](#)  
427 [teleconnection patterns, J. Clim., 13, 4430–4440,](#)  
428 [doi:10.1175/15200442\(2000\)0132.0.CO;2000.](#)

429 Gates, J. B., Scanlon, B. R., Mu, X. M., and Zhang, L.: Impacts of soil conservation  
430 on groundwater recharge in the semi-arid Loess Plateau, China, Hydrogeol. J., 19,  
431 865–875, 2011.

432 Graf, A., Bogen, H. R., Drüe, C., Hardelauf, H., Pütz, T., Heinemann, G., and  
433 Vereecken, H.: Spatiotemporal relations between water budget components and soil  
434 water content in a forested tributary catchment, Water Resour. Res., 50, 4837–4857,  
435 doi:10.1002/2013WR014516, 2014.

436 Grayson, R. B., Western, A. W., Chiew, F. H. S., and Blöschl, G.: Preferred states in  
437 spatial soil moisture patterns: local and nonlocal controls, Water Resour. Res., 33,  
438 2897–2908, doi: 10.1029/97WR02174, 1997.

439 Grinsted, A., Moore, J. C., and Jevrejeva, S.: Application of the cross wavelet  
440 transform and wavelet coherence to geophysical time series, Nonlinear Proc. Geoph.,  
441 11, 561–566, 2004.

442 Hu, W., Biswas, A., and Si, B. C.: Application of multivariate empirical mode  
443 decomposition for revealing scale- and season-specific time stability of soil water  
444 storage, Catena, 113, 377–385, doi:10.1016/j.catena.2013.08.024, 2014.

445 Hu, W. and Si, B. C.: Soil water prediction based on its scale-specific control using  
446 multivariate empirical mode decomposition, Geoderma, 193–194, 180–188, doi:

447 10.1016/j.geoderma.2012.10.021, 2013.

448 Koopmans, L. H.: The spectral analysis of time series, Academic Press, New York,  
449 1974.

450 Labat, D.: Recent advances in wavelet analyses: Part I. A review of concepts, J.  
451 Hydrol., 314, 275–288, doi: 10.1016/j.jhydrol.2005.04.003, 2005.

452 Lakshmi, V., Piechota, T., Narayan, U., and Tang, C. L.: Soil moisture as an indicator  
453 of weather extremes, Geophys. Res. Lett., 31, L11401, doi:10.1029/2004GL019930,  
454 2004.

455 Li, Z., Zheng, F. L., and Liu, W. Z.: Spatiotemporal characteristics of reference  
456 evapotranspiration during 1961–2009 and its projected changes during 2011–2099 on  
457 the Loess Plateau of China, Agric. For. Meteorol., 154–155, 147–155,  
458 doi:10.1016/j.agrformet.2011.10.019, 2012.

459 [Maraun, D. and Kurths, J.: Cross wavelet analysis: significance testing and pitfalls,](#)  
460 [Nonlin. Processes Geophys., 11, 505–514, doi: 10.5194/npg-11-505-2004, 2004.](#)

461 [Maraun, D., Kurths, J., and Holschneider, M.: Nonstationary Gaussian processes in](#)  
462 [wavelet domain: synthesis, estimation, and significance testing, Phys. Rev. E., 75,](#)  
463 [016707, doi:10.1103/PhysRevE.75.016707, 2007.](#)

464 Mihanović, H., Orlić, M., and Pasrić, Z.: Diurnal thermocline oscillations driven by  
465 tidal flow around an island in the Middle Adriatic, J. Marine Syst., 78, S157–S168,  
466 doi: 10.1016/j.jmarsys.2009.01.021, 2009.

467 Müller, W. A., Frankignoul, C., and Chouaib, N.: Observed decadal tropical  
468 Pacific–North Atlantic teleconnections, Geophys. Res. Lett., 35, L24810,

doi:10.1029/2008GL035901, 2008.

Ng, E. K. W. and Chan, J. C. L.: Geophysical applications of partial wavelet coherence and multiple wavelet coherence, *J. Atmos. Ocean. Tech.*, 29, 1845–1853, doi: 10.1175/JTECH-D-12-00056.1, 2012a.

Ng, E. K. W. and Chan, J. C. L.: Interannual variations of tropical cyclone activity over the north Indian Ocean, *Int. J. Climatol.*, 32, 819–830, doi: 10.1002/joc.2304, 2012b.

Polansky, L., Wittemyer, G., Cross, P. C., Tambling, C. J., and Getz, W. M.: From moonlight to movement and synchronized randomness: Fourier and wavelet analyses of animal location time series data, *Ecology*, 91, 1506–1518, doi: 10.1890/08-2159.1, 2010.

Rehman, N. and Mandic, D. P.: Multivariate empirical mode decomposition, *Proc. R. Soc. A.*, 466, 1291–1302, doi:10.1098/rspa.2009.0502, 2010.

Schulte, J. A.: Cumulative areawise testing in wavelet analysis and its application to geophysical time series, *Nonlin. Processes Geophys.*, 23, 45–57, doi:10.5194/npg-2345-2016, 2016.

Schulte, J. A., Duffy, C., and Najjar, R. G.: Geometric and topological approaches to significance testing in wavelet analysis, *Nonlin. Processes Geophys.*, 22, 139–156, doi:10.5194/npg-22-139-2015, 2015.

She, D. L., Liu, D. D., Peng, S. Z., and Shao, M. A.: Multiscale influences of soil properties on soil water content distribution in a watershed on the Chinese Loess Plateau, *Soil Sci.*, 178, 530–539, doi: 10.1097/SS.000000000000021, 2013.

491 She, D. L., Zheng, J. X., Shao, M. A., Timm, L. C., and Xia, Y. Q.: Multivariate  
 492 empirical mode decomposition derived multi-scale spatial relationships between  
 493 saturated hydraulic conductivity and basic soil properties, *Clean-Soil Air Water*, doi:  
 494 10.1002/clen.201400143, 2015.

495 Si, B. C.: Spatial scaling analyses of soil physical properties: A review of spectral and  
 496 wavelet methods, *Vadose Zone J.*, 7, 547–562, doi: 10.2136/vzj2007.0040, 2008.

497 Si, B. C. and Zeleke, T. B.: Wavelet coherency analysis to relate saturated hydraulic  
 498 properties to soil physical properties, *Water Resour. Res.*, 41, W11424,  
 499 doi:10.1029/2005WR004118, 2005.

500 Tang, C. L. and Piechota, T. C.: Spatial and temporal soil moisture and drought  
 501 variability in the Upper Colorado River Basin, *J. Hydrol.*, 379, 122–135, doi:  
 502 10.1016/j.jhydrol.2009.09.052, 2009.

503 Torrence, C. and Compo, G. P.: A practical guide to wavelet analysis, *Bull. Am.*  
 504 *Meteorol. Soc.*, 79, 61–78, doi: 10.1175/1520-0477(1998)079<0061:apgtwa>2.0.co;2,  
 505 1998.

506 Torrence, C. and Webster, P. J.: Interdecadal changes in the ENSO-monsoon system, *J.*  
 507 *Clim.*, 12, 2679–2690, doi: 10.1175/1520-0442(1999)012<2679:ICITEM>2.0.CO;2,  
 508 1999.

509 Yan, R. and Gao, R. X.: A tour of the Hilbert–Huang transform: an empirical tool for  
 510 signal analysis, *IEEE Instrum. Meas. Mag.*, 10, 40–45, doi:  
 511 10.1109/MIM.2007.4343566, 2007.



## Figure captions

**Figure 1.** (a) Stationary and (b) non-stationary series of response variables ( $y$  for stationary and  $z$  for non-stationary case) encompassing five cosine waves ( $y_1$  to  $y_5$  for stationary and  $z_1$  to  $z_5$  for non-stationary case) with different dimensionless scales.

**Figure 2.** Multiple wavelet coherence (a) between response variable  $y$  and predictor variables  $y_2$  and  $y_4$ ; (b) between response  $y$  and predictors  $y_2$ ,  $y_3$ , and  $y_4$ ; (c) between response  $z$  and predictors  $z_2$  and  $z_4$ ; and (d) between response  $z$  and predictors  $z_2$ ,  $z_3$ , and  $z_4$ . The artificial data series ( $y$ ) encompasses five cosine waves ( $y_1$ ,  $y_2$ ,  $y_3$ ,  $y_4$ , and  $y_5$ ) with different scales for the stationary case, and the artificial data series ( $z$ ) encompasses five cosine waves ( $z_1$ ,  $z_2$ ,  $z_3$ ,  $z_4$ , and  $z_5$ ) with different scales for the non-stationary case. The predictor variables, connected by a hyphen, are shown in the top right corner of each subplot. Thin solid lines demarcate the cones of influence, and thick solid lines show the 95% confidence levels.

**Figure 3.** Multiple wavelet coherence (a) between  $y$  and  $y_{2h0}$  and  $y_4$ ; (b) between  $y$  and  $y_2$  and  $y_{4h0}$ ; (c) between  $z$  and  $z_{2h0}$  and  $z_4$ ; and (d) between  $z$  and  $z_2$  and  $z_{4h0}$ . The artificial data series ( $y$ ) encompasses five cosine waves ( $y_1$ ,  $y_2$ ,  $y_3$ ,  $y_4$ , and  $y_5$ ) with different scales for the stationary case and the artificial data series ( $z$ ) encompasses five cosine waves ( $z_1$ ,  $z_2$ ,  $z_3$ ,  $z_4$ , and  $z_5$ ) with different scales for the non-stationary case. The variables  $y_{2h0}$  (or  $z_{2h0}$ ) and  $y_{4h0}$  (or  $z_{4h0}$ ) refer to the new series of  $y_2$  (or  $z_2$ ) and  $y_4$  (or  $z_4$ ), in which the second half is replaced by 0. The

predictor variables, connected by a hyphen, are shown in the top right corner of each subplot. Thin solid lines demarcate the cones of influence and thick solid lines show the 95% confidence levels.

**Figure 4.** Multiple wavelet coherence of an artificial data series ( $z$ ) encompassing five cosine waves ( $z_1, z_2, z_3, z_4$ , and  $z_5$ ) with different scales and (a)  $z_2$  and noised  $z_2$ , (b)  $z_2$  and noised  $z_4$ , and (c)  $z_2, z_4$ , and noised  $z_4$  for the non-stationary case. The predictor variables are connected by a hyphen and shown in the top right corner of each subplot.  $z_2wn$  ( $z_4wn$ ),  $z_2mn$  ( $z_4mn$ ), and  $z_2sn$  ( $z_4sn$ ) indicate weakly, moderately, and strongly noised  $z_2$  ( $z_4$ ) series, respectively. Weakly, moderately, and strongly noised series are correlated with original series, having correlation coefficients of 0.9, 0.5, and 0.1, respectively. Thin solid lines demarcate the cones of influence and thick solid lines show the 95% confidence levels.

**Figure 5.** Multiple spectral coherence (MSC) of an artificial data series ( $y$  or  $z$ ) encompassing five cosine waves ( $y_1$  to  $y_5$ ; or  $z_1$  to  $z_5$ ) with different scales and (a) two ( $y_2$  and  $y_4$ ; or  $z_2$  and  $z_4$ ) or three ( $y_2, y_3$ , and  $y_4$ ; or  $z_2, z_3$ , and  $z_4$ ) data series, and (b) two ( $y_2$  and  $y_4$ ; or  $z_2$  and  $z_4$ ) data series when the second half of one data series is replaced by 0. The variables  $y_2h0$  (or  $z_2h0$ ) and  $y_4h0$  (or  $z_4h0$ ) refer to the new series of  $y_2$  (or  $z_2$ ) and  $y_4$  (or  $z_4$ ) in which the second half is replaced by 0.

**Figure 6.** Multiple correlation coefficient between multivariate empirical mode decomposition ( $MCC_{memd}$ ) of an artificial series ( $y$  or  $z$ ) and (a) two ( $y_2$  and  $y_4$ ; or  $z_2$  and  $z_4$ ) or three ( $y_2, y_3$ , and  $y_4$ ; or  $z_2, z_3$ , and  $z_4$ ) data series, and (b) two ( $y_2$  and  $y_4$ ; or  $z_2$  and  $z_4$ ) data series when the second half of one data series is replaced by 0. The

555 variables  $y_{2h0}$  (or  $z_{2h0}$ ) and  $y_{4h0}$  (or  $z_{4h0}$ ) refer to the new series of  $y_2$  (or  $z_2$ ) and  
556  $y_4$  (or  $z_4$ ) in which the second half is replaced by 0.

557 **Figure 7.** Multiple wavelet coherence between evaporation ( $E$ ) from water surfaces  
558 and meteorological factors ((a) relative humidity and mean temperature and (b)  
559 relative humidity, mean temperature, and sun hours) at Changwu site in Shaanxi,  
560 China. Thin solid lines demarcate the cones of influence, and thick solid lines show  
561 the 95% confidence level.

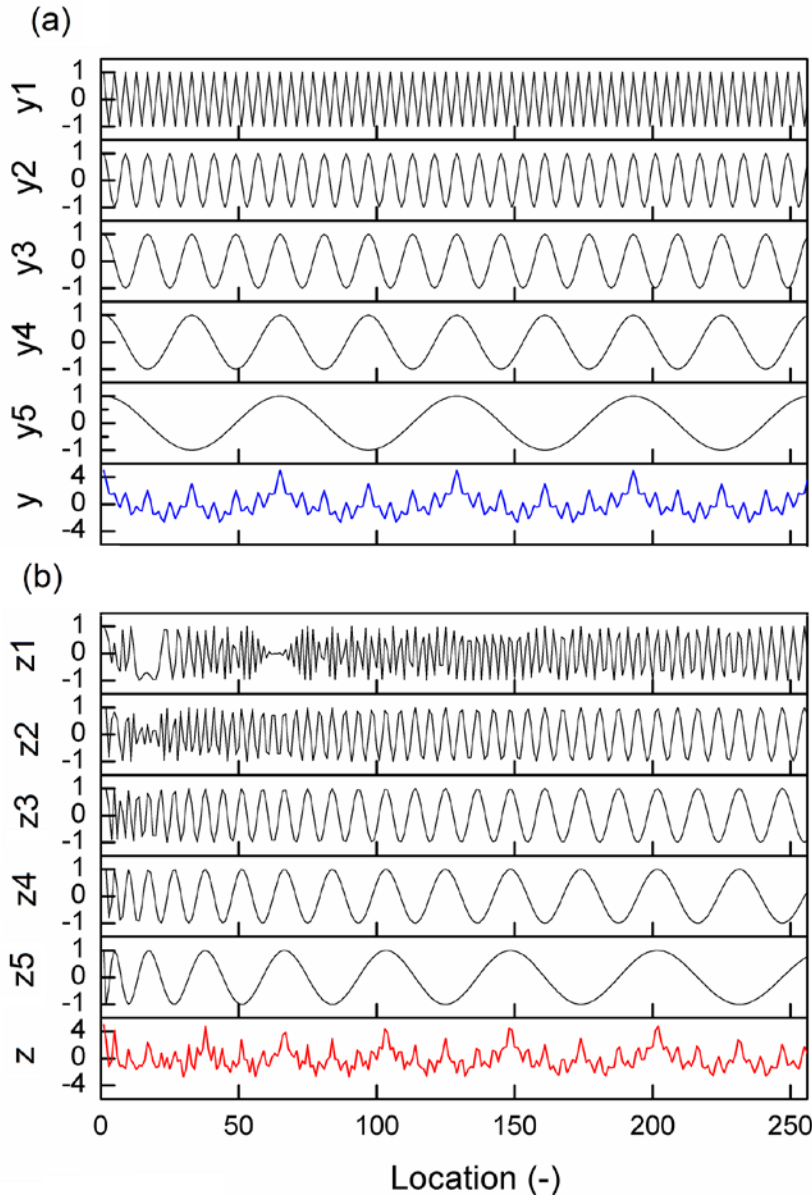

**Figure 1.** (a) Stationary and (b) non-stationary series of response variables ( $y$  for stationary and  $z$  for non-stationary case) encompassing five cosine waves ( $y1$  to  $y5$  for stationary and  $z1$  to  $z5$  for non-stationary case) with different dimensionless scales.

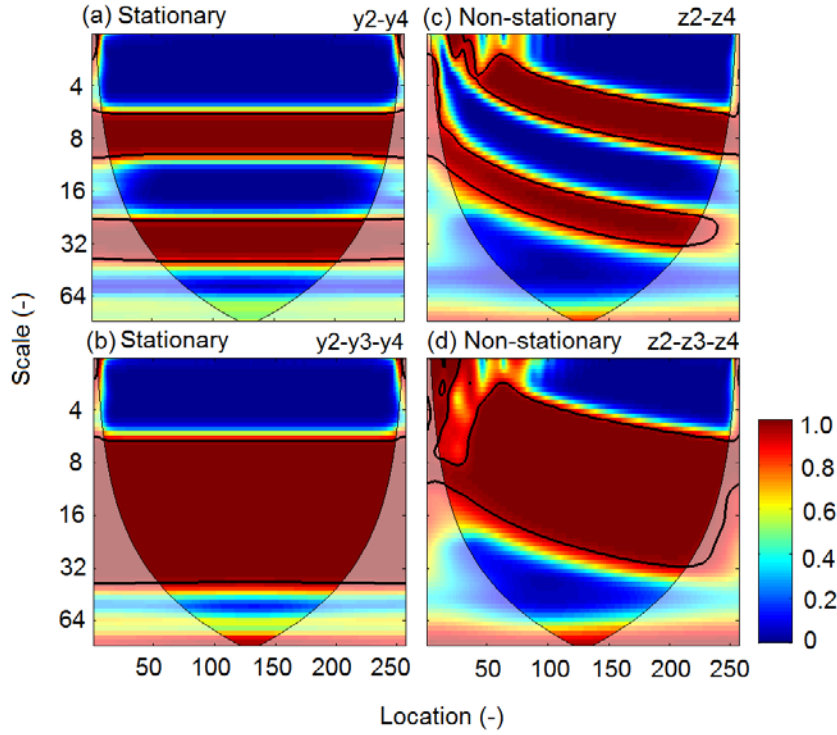

**Figure 2.** Multiple wavelet coherence (a) between response variable  $y$  and predictor variables  $y_2$  and  $y_4$ ; (b) between response  $y$  and predictors  $y_2$ ,  $y_3$ , and  $y_4$ ; (c) between response  $z$  and predictors  $z_2$  and  $z_4$ ; and (d) between response  $z$  and predictors  $z_2$ ,  $z_3$ , and  $z_4$ . The artificial data series ( $y$ ) encompasses five cosine waves ( $y_1$ ,  $y_2$ ,  $y_3$ ,  $y_4$ , and  $y_5$ ) with different scales for the stationary case, and the artificial data series ( $z$ ) encompasses five cosine waves ( $z_1$ ,  $z_2$ ,  $z_3$ ,  $z_4$ , and  $z_5$ ) with different scales for the non-stationary case. The predictor variables, connected by a hyphen, are shown in the top right corner of each subplot. Thin solid lines demarcate the cones of influence, and thick solid lines show the 95% confidence levels.

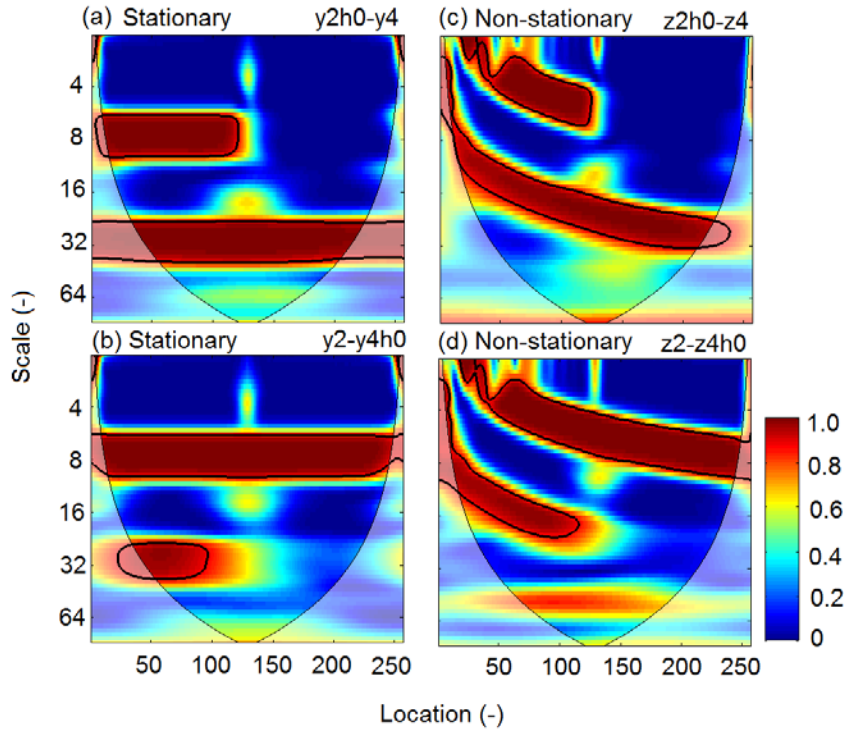

**Figure 3.** Multiple wavelet coherence (a) between  $y$  and  $y2h0$  and  $y4$ ; (b) between  $y$  and  $y2$  and  $y4h0$ ; (c) between  $z$  and  $z2h0$  and  $z4$ ; and (d) between  $z$  and  $z2$  and  $z4h0$ . The artificial data series ( $y$ ) encompasses five cosine waves ( $y1$ ,  $y2$ ,  $y3$ ,  $y4$ , and  $y5$ ) with different scales for the stationary case and the artificial data series ( $z$ ) encompasses five cosine waves ( $z1$ ,  $z2$ ,  $z3$ ,  $z4$ , and  $z5$ ) with different scales for the non-stationary case. The variables  $y2h0$  (or  $z2h0$ ) and  $y4h0$  (or  $z4h0$ ) refer to the new series of  $y2$  (or  $z2$ ) and  $y4$  (or  $z4$ ), in which the second half is replaced by 0. The predictor variables, connected by a hyphen, are shown in the top right corner of each subplot. Thin solid lines demarcate the cones of influence and thick solid lines show the 95% confidence levels.

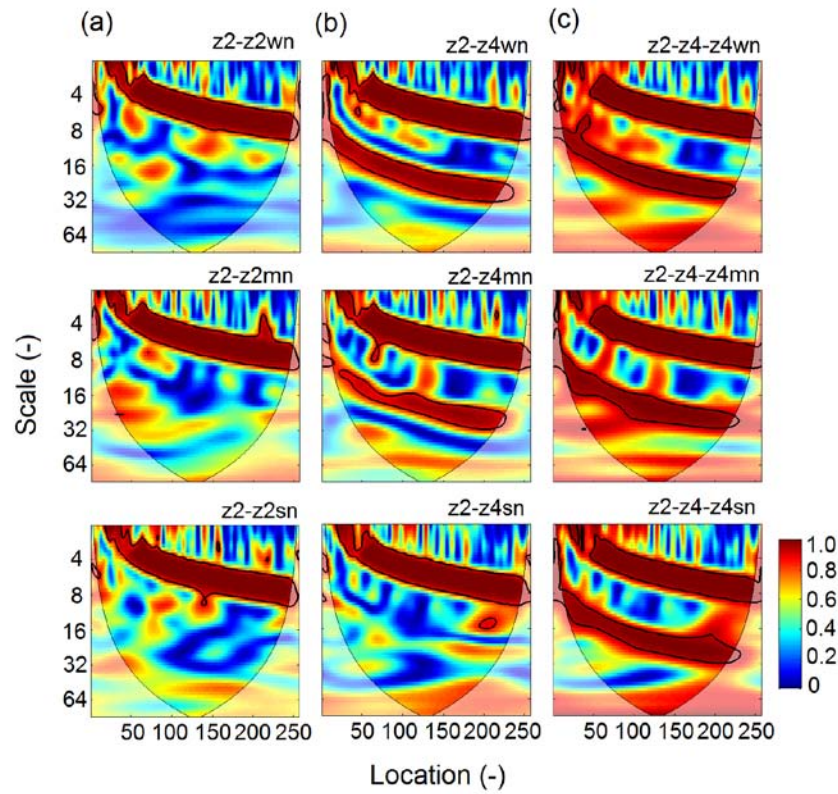

**Figure 4.** Multiple wavelet coherence of an artificial data series ( $z$ ) encompassing five cosine waves ( $z_1$ ,  $z_2$ ,  $z_3$ ,  $z_4$ , and  $z_5$ ) with different scales and (a)  $z_2$  and noised  $z_2$ , (b)  $z_2$  and noised  $z_4$ , and (c)  $z_2$ ,  $z_4$ , and noised  $z_4$  for the non-stationary case. The predictor variables are connected by a hyphen and shown in the top right corner of each subplot.  $z_2wn$  ( $z_4wn$ ),  $z_2mn$  ( $z_4mn$ ), and  $z_2sn$  ( $z_4sn$ ) indicate weakly, moderately, and strongly noised  $z_2$  ( $z_4$ ) series, respectively. Weakly, moderately, and strongly noised series are correlated with original series, having with correlation coefficients of 0.9, 0.5, and 0.1, respectively. Thin solid lines demarcate the cones of influence and thick solid lines show the 95% confidence levels.

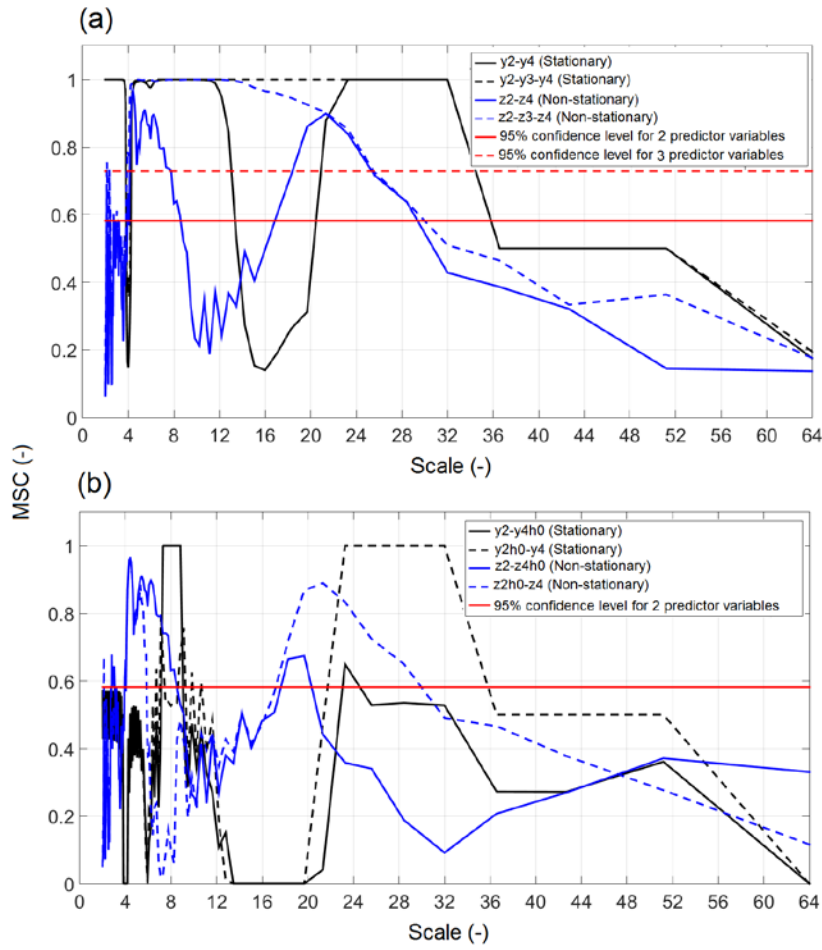

**Figure 5.** Multiple spectral coherence (MSC) of an artificial data series (y or z) encompassing five cosine waves (y1 to y5; or z1 to z5) with different scales and (a) two (y2 and y4; or z2 and z4) or three (y2, y3, and y4; or z2, z3, and z4) data series, and (b) two (y2 and y4; or z2 and z4) data series when the second half of one data series is replaced by 0. The variables y2h0 (or z2h0) and y4h0 (or z4h0) refer to the new series of y2 (or z2) and y4 (or z4) in which the second half is replaced by 0.



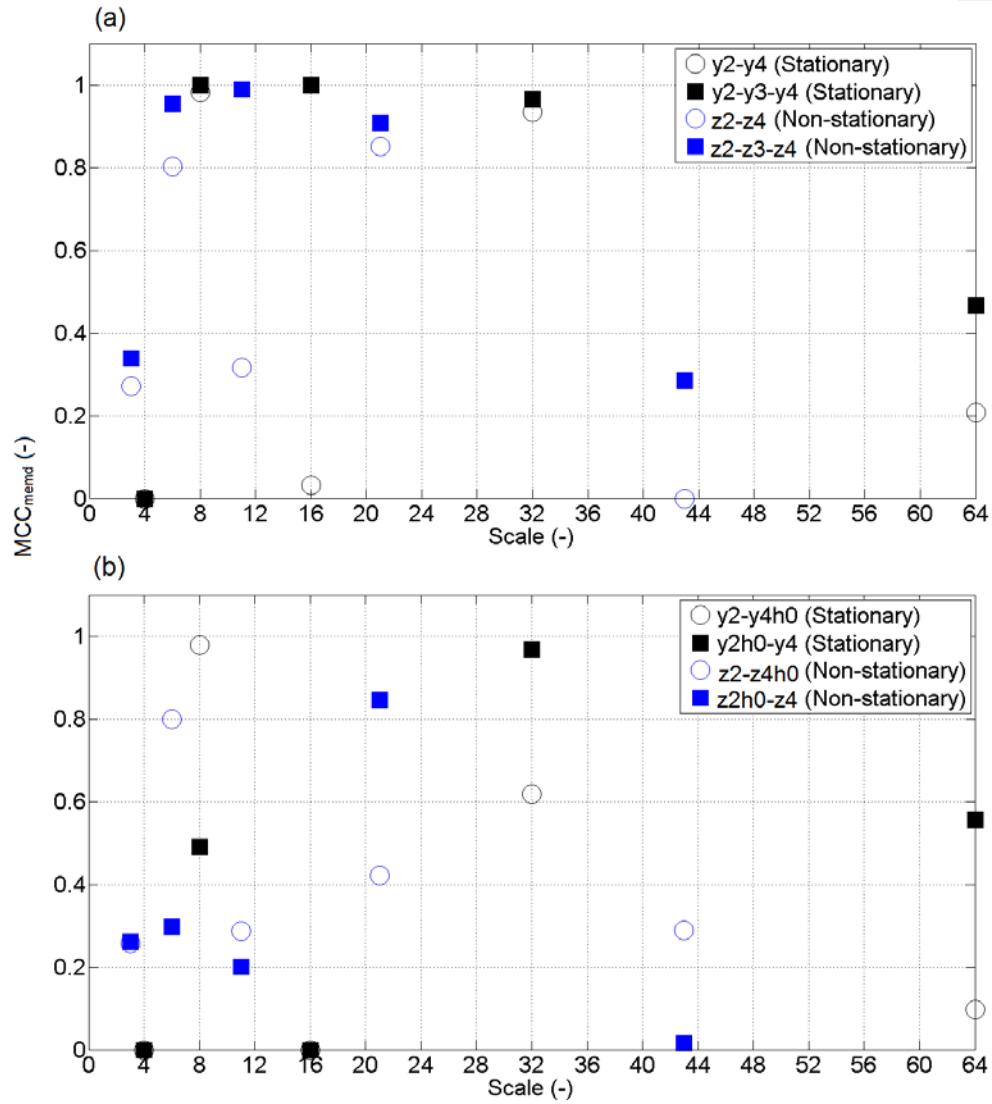

**Figure 6.** Multiple correlation coefficient between multivariate empirical mode decomposition ( $MCC_{memd}$ ) of an artificial series (y or z) and (a) two (y2 and y4; or z2 and z4) or three (y2, y3, and y4; or z2, z3, and z4) data series, and (b) two (y2 and y4; or z2 and z4) data series when the second half of one data series is replaced by 0. The variables y2h0 (or z2h0) and y4h0 (or z4h0) refer to the new series of y2 (or z2) and y4 (or z4) in which the second half is replaced by 0.

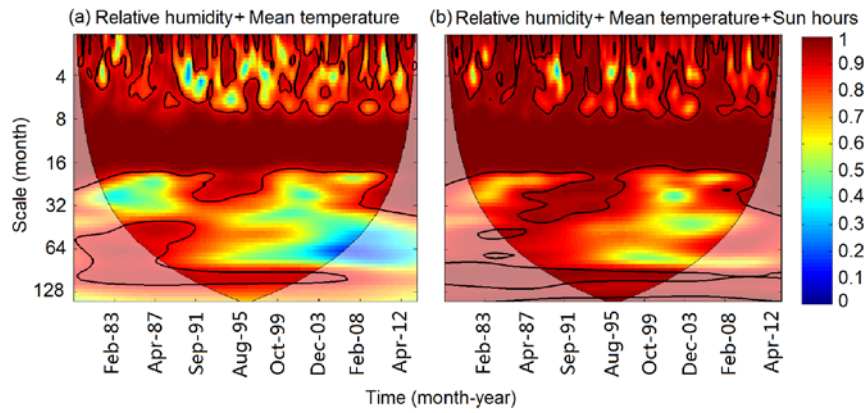

**Figure 7.** Multiple wavelet coherence between evaporation (E) from water surfaces and meteorological factors ((a) relative humidity and mean temperature and, (b) relative humidity, mean temperature, and sun hours) at Changwu site in Shaanxi, China. Thin solid lines demarcate the cones of influence, and thick solid lines show the 95% confidence level.
